# Supplementary material for: Catalyst-free contact-electro-catalytic H2O2 synthesis via simple combination of a poly(tetrafluoroethylene) stir bar and ultrasound
Source: Royal Society of Chemistry journal article supplement (doi:10.1039/d4cc01576b), 2024-01-01
Supplement: d4cc01576b1.pdf [file d4cc01576b1.pdf]

1 Supporting Information

2

3 **Catalyst-free contact-electro-catalytic H<sub>2</sub>O<sub>2</sub> synthesis via simple**  
4 **combination of poly(tetrafluoroethylene) stir bar and ultrasound**

5

6 **Authors:** Yao Wang,<sup>a</sup> Yanfeng Wang,<sup>\*a, b</sup> Baowei Hu,<sup>a</sup> Muqing Qiu,<sup>a</sup> Guandao Gao,<sup>c</sup>  
7 Peiyun Wei,<sup>\*a, b</sup>

8

9 **Affiliations:**

10 <sup>a</sup>School of Life and Environmental Sciences, Shaoxing University, Huancheng Road 508,  
11 Shaoxing 312000, China.

12 <sup>b</sup>Department of Environmental Science, Zhejiang University, Yuhangtang Road 866,  
13 Hangzhou310058, China.

14 <sup>c</sup>State Key Laboratory of Pollution Control and Resource Reuse, School of Environment,  
15 Nanjing University, Nanjing 210023, China.

16 \*Correspondence to: wangyanfeng@usx.edu.cn; peiyunwei@usx.edu.cn

17

18 **This PDF file includes:**

19

20 Figure S1 to S8

21 Table S1 to S2

22 Supporting References

## 24 **Materials and methods**

### 25 **Materials and Reagents**

26 PTFE stir bar and stainless steel stir bar were purchased from Henghua Experimental Co.,  
27 Ltd. Potassium titanium (IV) oxalate, 5,5-dimethyl-1-pyrrolin-N-oxide (DMPO), dimethyl  
28 sulfoxide (DMSO), tert-butanol (TBA), were supplied by Macklin. Commercially  
29 available H<sub>2</sub>O<sub>2</sub> test papers were purchased from Hangzhou Luheng Biotechnology Co.,  
30 Ltd. Calcium chloride (CaCl<sub>2</sub>), Calcium nitrate (Ca(NO<sub>3</sub>)<sub>2</sub>), Sodium chloride (NaCl),  
31 Magnesium nitrate (Mg(NO<sub>3</sub>)<sub>2</sub>), Magnesium chloride (MgCl<sub>2</sub>), Aluminum chloride  
32 (AlCl<sub>3</sub>), Zinc chloride (ZnCl<sub>2</sub>), Sodium sulfate (Na<sub>2</sub>SO<sub>4</sub>), Sodium carbonate (Na<sub>2</sub>CO<sub>3</sub>) and  
33 Sodium Phosphate (Na<sub>3</sub>PO<sub>4</sub>) and glucose were purchased from Sinopharm Chemical  
34 Reagent Co. Ltd., Shanghai, China.

35

### 36 **Experimental Procedure**

37 **H<sub>2</sub>O<sub>2</sub> production in the PTFE stir bar + ultrasound system.** 50 mL deionized water was  
38 exposed to ultrasound irradiation (Model JP040S, 240 W, Skymen, China) and continuous  
39 mechanical stirring (Model JJ-1, Jintan Co. Ltd, China) in ambient conditions, 1 mL sample  
40 solution was taken out every 30 minutes for testing. The pH was adjusted with 1 M of  
41 dilute H<sub>2</sub>SO<sub>4</sub> or NaOH. Notably, the effect of ultrasonic power on H<sub>2</sub>O<sub>2</sub> generation was  
42 conducted in an ultrasonic cleaner (Model KQ-250DA, 250 W, Kunshan Shumei, China)  
43 with adjustable power.

44

45

### 46 **Quantitative characterization of H<sub>2</sub>O<sub>2</sub> Production.**

47 The concentration of H<sub>2</sub>O<sub>2</sub> was determined using the potassium titanium (IV) oxalate  
48 method. To prepare the potassium titanium (IV) oxalate reagent, a solution was made by  
49 dissolving 7.083 g of potassium titanium (IV) oxalate in 136 mL of 98% H<sub>2</sub>SO<sub>4</sub> and 114  
50 mL of deionized water. Subsequently, 0.5 mL of the sample and 0.5 mL of potassium  
51 titanium (IV) oxalate reagent were combined in a 10 mL colorimetric tube and then diluted  
52 to 5 mL. The resulting mixture was analyzed using a UV-vis spectrophotometer  
53 (Shimadzu, UV-2600) at a wavelength of 400 nm. The concentration of H<sub>2</sub>O<sub>2</sub> was

54 determined using the equation provided in Figure S8. The high correlation coefficient ( $R^2$   
55 = 0.9997) indicates that the calibration curve is accurate and reliable.  
56

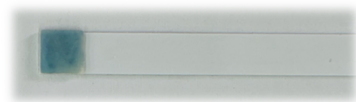

Color chart: mg/L

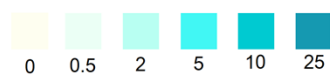

57

58 **Figure S1.** The photo of commercial H<sub>2</sub>O<sub>2</sub> test paper exposed to H<sub>2</sub>O<sub>2</sub> produced in the  
59 PTFE stir bar + ultrasound system.

60

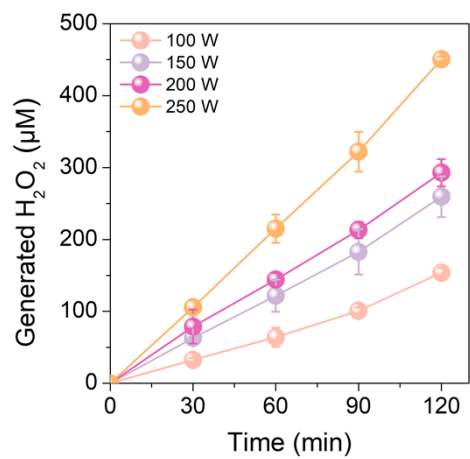

61

62 **Figure S2.** Effect of ultrasonic power on H<sub>2</sub>O<sub>2</sub> generation.

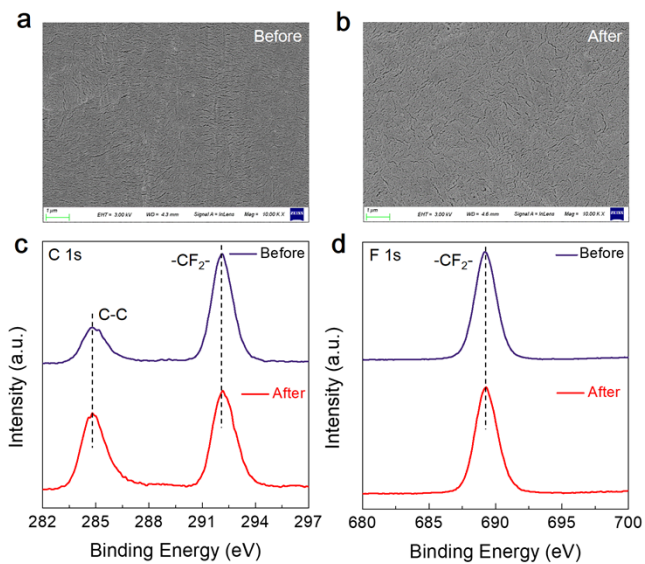

64

65 **Figure S3.** SEM (a, b) and XPS (c, d) characterization of PTFE stir bar before and after  
 66 reaction.

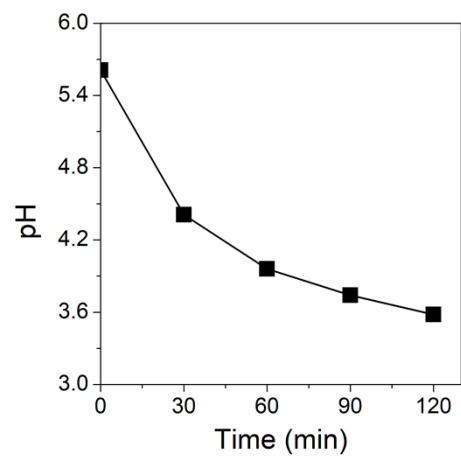

68

69 **Figure S4.** pH change of the solution in the PTFE stir bar + ultrasound system.

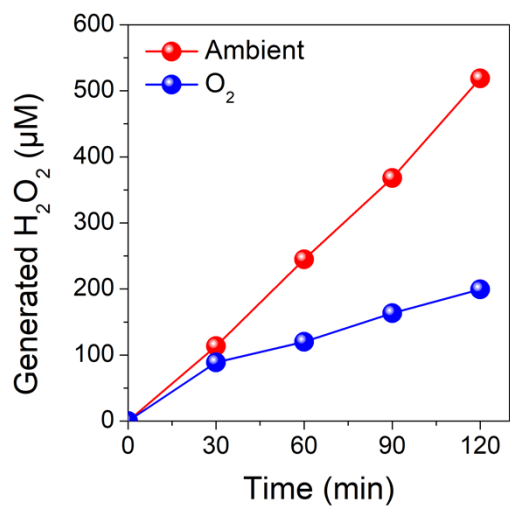

71

72 **Figure S5.** Effect of O<sub>2</sub> on the amount of H<sub>2</sub>O<sub>2</sub> generation.



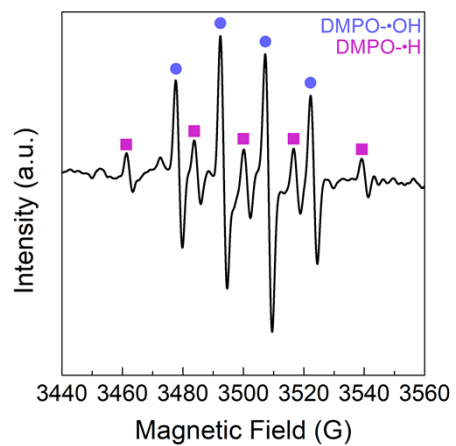

73

74 **Figure S6.** EPR signals for DMPO-•H in the PTFE stir bar + ultrasound system under

75 ambient atmospheric conditions.

76

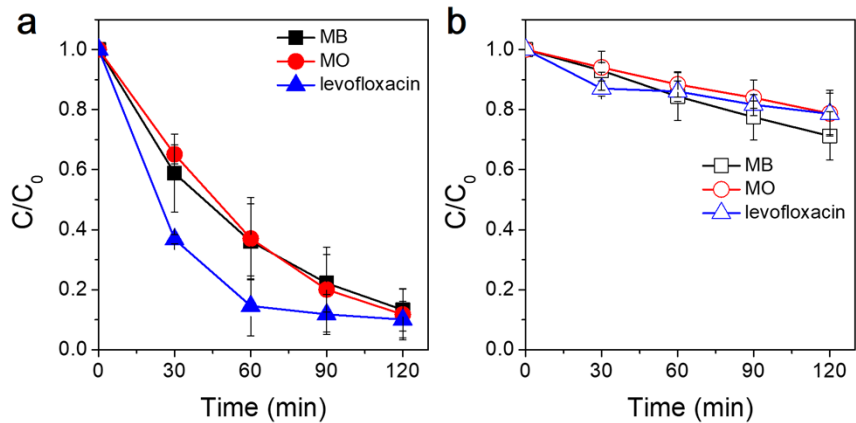

77

78 **Figure S7.** Pollutants degradation in the PTFE stir bar + ultrasound system (a) and pure

79 ultrasound system (b).  $[MB]_0=5$  mg/L;  $[MO]_0=5$  mg/L;  $[levofloxacin]_0=1$  mg/L.

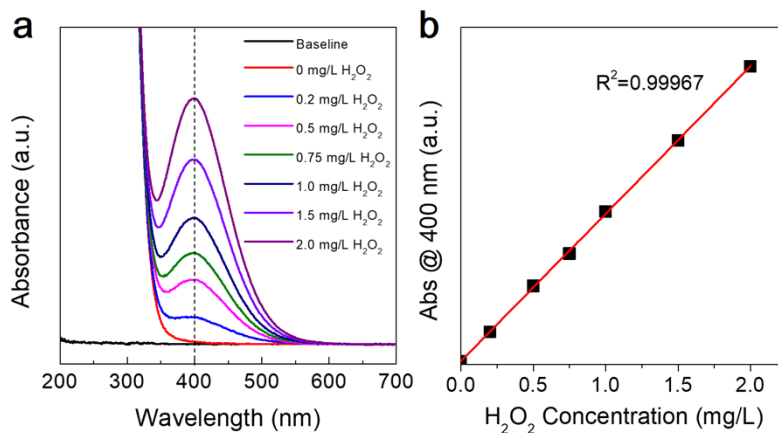

81

82 **Figure S8.** (a) Absorption spectrum of aqueous potassium titanium oxalate solution with  
83 different concentrations of H<sub>2</sub>O<sub>2</sub>. (b) The work curve of the concentration of H<sub>2</sub>O<sub>2</sub> and the  
84 absorption.

85

86 **Table S1.** Comparison of H<sub>2</sub>O<sub>2</sub> generation determined in the PTFE stir bar + ultrasound system and by  
 87 piezocatalysis  
 88

| Material                                                             | reaction solution | Atmosphere              | Irradiation conditions | Reactor volume | H <sub>2</sub> O <sub>2</sub> production rate (μM h <sup>-1</sup> ) | Ref.      |
|----------------------------------------------------------------------|-------------------|-------------------------|------------------------|----------------|---------------------------------------------------------------------|-----------|
| C <sub>3</sub> N <sub>5-x</sub> -O                                   | water             | 0.5 g L <sup>-1</sup>   | 40 kHz, 300 W          | 20 mL          | 6.15                                                                | 1         |
| Au-Bi <sub>4</sub> Ti <sub>3</sub> O <sub>12</sub>                   | water             | 2 g L <sup>-1</sup>     | 40 kHz, 100 W          | 10 mL          | 8.1                                                                 | 2         |
| Cd <sub>0.5</sub> Zn <sub>0.5</sub> S                                | water             | 2 g L <sup>-1</sup>     | 40 kHz, 120 W          | 100 mL         | 11.0                                                                | 3         |
| V-NaNbO <sub>3</sub>                                                 | water             | ~0.22 g L <sup>-1</sup> | 68 kHz, 192 W          | 45 mL          | 22.8                                                                | 4         |
| Bone-800                                                             | water             | 0.2 g L <sup>-1</sup>   | 40 kHz, 150 W          | 50 mL          | 35.9                                                                | 5         |
| Bi <sub>4</sub> O <sub>5</sub> I <sub>2</sub>                        | water             | 0.1 g L <sup>-1</sup>   | 40 kHz, 240 W          | 100 mL         | 44.7                                                                | 6         |
| C-KNbO <sub>3</sub>                                                  | water             | 2 g L <sup>-1</sup>     | -                      | 25 mL          | 51.8                                                                | 7         |
| SnS <sub>2</sub> /CNFs                                               | water             | 0.8 g L <sup>-1</sup>   | 40 kHz, 300 W          | 100 mL         | ~66.3                                                               | 8         |
| Fe/BiVO <sub>4</sub>                                                 | water             | 0.5 g L <sup>-1</sup>   | 40 kHz, 120 W          | 50 mL          | ~75                                                                 | 9         |
| Au/BiVO <sub>4</sub>                                                 | water             | 0.5 g L <sup>-1</sup>   | 40 kHz, 120 W          | 50 mL          | ~86.1                                                               | 10        |
| Ag <sub>(SA+C)</sub> -CN                                             | water             | 0.02 g L <sup>-1</sup>  | 40 kHz, 180 W          | 100 mL         | 117                                                                 | 11        |
| (Bi <sub>0.5</sub> Na <sub>0.5</sub> )TiO <sub>3</sub> cubes         | water             | 0.1 g L <sup>-1</sup>   | 40 kHz, -              | 100 mL         | 125                                                                 | 12        |
| Bi <sub>4</sub> TaO <sub>8</sub> Cl                                  | water             | ~0.33g L <sup>-1</sup>  | 37 kHz, 110 W          | 30 mL          | 133                                                                 | 13        |
| RbBiNb <sub>2</sub> O <sub>7</sub> /PTFE                             | water             | ~0.67 g L <sup>-1</sup> | 68 kHz, 240 W          | 30 mL          | 146.2                                                               | 14        |
| g-C <sub>3</sub> N <sub>4</sub> /PDI-g-C <sub>3</sub> N <sub>4</sub> | water             | 0.6 g L <sup>-1</sup>   | 40 kHz, 200 W          | 50 mL          | 149.85                                                              | 15        |
| Ag/ <i>t</i> -BaTiO <sub>3</sub>                                     | water             | 2.0 g L <sup>-1</sup>   | 40 kHz, 110 W          | 200 mL         | 160.6                                                               | 16        |
| BaTiO <sub>3</sub> -O <sub>V</sub>                                   | water             | 1 g L <sup>-1</sup>     | 50 kHz, 100 W          | 50 mL          | 205                                                                 | 17        |
| BiOCl                                                                | water             | 0.5 g L <sup>-1</sup>   | 53 kHz, 150 W          | 100 mL         | 280                                                                 | 18        |
| Hydroxyapatite                                                       | water             | 1.3 g L <sup>-1</sup>   | 40 kHz, 300 W          | 25 mL          | ~304                                                                | 19        |
| PTFE stir bar                                                        | water             | -                       | 40 kHz, 300 W          | 50 mL          | 256.6                                                               | This work |

89

90 **Table S2.** Comparison of H<sub>2</sub>O<sub>2</sub> generation determined in the PTFE stir bar + ultrasound system and by  
 91 photocatalysis  
 92

| Material                                                                        | reaction solution | Concentration of photocatalyst | Irradiation conditions                                                | Reactor volume | H <sub>2</sub> O <sub>2</sub> yield in 1 h (μM h <sup>-1</sup> ) | Ref.      |
|---------------------------------------------------------------------------------|-------------------|--------------------------------|-----------------------------------------------------------------------|----------------|------------------------------------------------------------------|-----------|
| C-N-g-C <sub>3</sub> N <sub>4</sub>                                             | water             | 1.33 g L <sup>-1</sup>         | 420 nm ≤ λ ≤ 700 nm<br>40 mW/cm <sup>2</sup><br>40 mW/cm <sup>2</sup> | 15 mL          | 1.0                                                              | 20        |
| g-C <sub>3</sub> N <sub>4</sub> aerogels                                        | water             | 1.7 g L <sup>-1</sup>          | >420 nm                                                               | 30 mL          | 1.4                                                              | 21        |
| Cv-g-C <sub>3</sub> N <sub>4</sub>                                              | water             | 1.0 g L <sup>-1</sup>          | 300 W Xenon lamp<br>>420 nm                                           | 100 mL         | 9                                                                | 22        |
| N-Cu <sub>2</sub> O@CuO                                                         | water             | 1.5 g L <sup>-1</sup>          | 300 W Xe lamp<br>>420 nm<br>>420 nm                                   | 10 mL          | 12.6                                                             | 23        |
| g-C <sub>3</sub> N <sub>4</sub> /PDIx                                           | water             | 1.67 g L <sup>-1</sup>         | (intensity at 420–500 nm: 26.9 W/cm <sup>2</sup> )<br>Xe lamp         | 30 mL          | 35.2                                                             | 24        |
| NBCN-ZnPPc                                                                      | water             | 0.5 g L <sup>-1</sup>          | 100 mW/cm <sup>2</sup> , 800 nm >λ> 400 nm)                           | 20 mL          | 57                                                               | 25        |
| CTF-BDDBN                                                                       | water             | 0.6 g L <sup>-1</sup>          | 300 W Xenon lamp<br>>420 nm                                           | 50 mL          | 58.3                                                             | 26        |
| g-C <sub>3</sub> N <sub>4</sub> /PI                                             | water             | 1.0 g L <sup>-1</sup>          | 300 W Xe lamp<br>>420 nm                                              | 50 mL          | 60                                                               | 27        |
| CN/rGO@BPQDs                                                                    | water             | 1.0 g L <sup>-1</sup>          | 300 W Xe lamp<br>>420 nm                                              | 50 mL          | 60.6                                                             | 28        |
| g-C <sub>3</sub> N <sub>4</sub> -PWO                                            | water             | 1.0 g L <sup>-1</sup>          | 300 W Xe lamp<br>>420 nm                                              | 100 mL         | 63                                                               | 29        |
| TiCOF-spn                                                                       | Water             | 0.33 g L <sup>-1</sup>         | 300 W Xenon lamp<br>420 nm ≤ λ ≤ 780 nm                               | 120 mL         | 74.5                                                             | 30        |
| Bi <sub>4</sub> O <sub>5</sub> Br <sub>2</sub> /g-C <sub>3</sub> N <sub>4</sub> | water             | 1.0 g L <sup>-1</sup>          | 300 W Xe lamp<br>>420 nm                                              | 50 mL          | 124                                                              | 31        |
| Au@MoS <sub>2</sub>                                                             | water             | 1.0 g L <sup>-1</sup>          | 300 W Xe lamp<br>>420 nm                                              | 50 mL          | 132.0                                                            | 32        |
| Pd/APTMS/TiO <sub>2</sub>                                                       | water             | 0.5 g L <sup>-1</sup>          | Xenon lamp solar simulator, 100 mW/cm <sup>2</sup>                    | 10 mL          | 150                                                              | 33        |
| HCOF                                                                            | water             | 0.2 g L <sup>-1</sup>          | 300 W Xenon lamp<br>>420 nm                                           | 10 mL          | 153.3                                                            | 34        |
| Zn <sup>2+</sup> /TiO <sub>2</sub>                                              | water             | 0.5 g L <sup>-1</sup>          | 125 W Hg lamp                                                         | 500 mL         | 220                                                              | 35        |
| Pt/TiO <sub>2</sub>                                                             | water             | 0.05 g L <sup>-1</sup>         | 500 W Hg lamp                                                         | 20 mL          | 254.8                                                            | 36        |
| PTFE stir bar                                                                   | water             | -                              | 40 kHz, 300 W                                                         | 50 mL          | 256.6                                                            | This work |

93

94

95 **Supporting References**

96

- 97 1. C. Fu, T. Wu, G. Sun, G. Yin, C. Wang, G. Ran, Q. Song, Dual-defect enhanced  
98 piezocatalytic performance of  $C_3N_5$  for multifunctional applications, *Appl. Catal. B-*  
99 *Environ.* 2023, **323**, 122196.
- 100 2. R. Lei, X. Fu, N. Chen, Y. Chen, W. Feng, P. Liu, Cocatalyst engineering to weaken  
101 the charge screening effect over  $Au-Bi_4Ti_3O_{12}$  for piezocatalytic pure water splitting,  
102 *Catal. Sci. Technol.* 2022, **12**, 7361-7368.
- 103 3. S. Lin, Q. Wang, H. Huang, Y. Zhang, Piezocatalytic and Photocatalytic Hydrogen  
104 Peroxide Evolution of Sulfide Solid Solution Nano-Branched from Pure Water and  
105 Air, *Small* 2022, **18**, 2200914.
- 106 4. Y. Li, L. Li, F. Liu, B. Wang, F. Gao, C. Liu, J. Fang, F. Huang, Z. Lin, M. Wang,  
107 Robust route to  $H_2O_2$  and  $H_2$  via intermediate water splitting enabled by capitalizing  
108 on minimum vanadium-doped piezocatalysts, *Nano Res.* 2022, **15**, 7986-7993.
- 109 5. Feixue Gao, Zhe Wang, Ming Fang, Xiaoli Tan, Shao Hui Xu, Mao Liu, Guang Tao  
110 Fei, and Li De Zhang, Biological calcium phosphate nanorods for piezocatalytic  
111 extraction of U(VI) from water, *Nano Res.*, 2023, **16**, 12772-12780.
- 112 6. C. Wang, C. Hu, F. Chen, H. Li, Y. Zhang, T. Ma, H. Huang, Polar layered bismuth-  
113 rich oxyhalide piezoelectrics  $Bi_4O_5X_2$  (X=Br, I): Efficient piezocatalytic pure water  
114 splitting and interlayer anion-dependent activity, *Adv. Funct. Mater.* 2023, **33**,  
115 2301144.
- 116 7. J. He, F. Gao, H. Wang, F. Liu, J. Lin, B. Wang, C. Liu, F. Huang, Z. Lin, M. Wang,  
117 C-Doped  $KNbO_3$  single crystals for enhanced piezocatalytic intermediate water  
118 splitting, *Environ. Sci.: Nano* 2022, **9**, 1952-1960.
- 119 8. W. Tian, J. Qiu, N. Li, D. Chen, Q. Xu, H. Li, J. He, J. Lu, Efficient piezocatalytic  
120 removal of BPA and Cr(VI) with  $SnS_2/CNFs$  membrane by harvesting vibration  
121 energy, *Nano Energy* 2021, **86**, 106036.
- 122 9. Y. Wei, Y. Zhang, J. Miao, W. Geng, M. Long, In-situ utilization of piezo-generated  
123 hydrogen peroxide for efficient p-chlorophenol degradation by Fe loading bismuth  
124 vanadate, *Appl. Surf. Sci.* 2021, **543**, 148791.
- 125 10. Wei, Y., Zhang, Y. W., Geng, W., Su, H. R., Long, M. C. Efficient bifunctional  
126 piezocatalysis of  $Au/BiVO_4$  for simultaneous removal of 4-chlorophenol and Cr(VI)  
127 in water. *Appl. Catal. B-Environ.* 2019, **259**, 118084.
- 128 11. C. Hu, J. Hu, Z. Zhu, Y. Lu, S. Chu, T. Ma, Y. Zhang, H. Huang, Orthogonal charge  
129 transfer by precise positioning of silver single atoms and clusters on carbon nitride for  
130 efficient piezocatalytic pure water splitting, *Angew. Chem. Int. Ed.* 2022, **61**,  
131 e202212397.
- 132 12. D. Liu, X. Sun, L. Tan, J. Zhang, C.-C. Jin, F. Wang, High-performance piezocatalytic  
133 hydrogen evolution by  $(Bi_{0.5}Na_{0.5})TiO_3$  cubes decorated with cocatalysts, *Ceram. Int.*  
134 2023, **49**, 20343-20350.
- 135 13. M. Banoo, R. S. Roy, M. Bhakar, J. Kaur, A. Jaiswal, G. Sheet, U. K. Gautam,  
136  $Bi_4TaO_8Cl$  as a new class of layered perovskite oxyhalide materials for piezopotential  
137 driven efficient seawater splitting, *Nano Lett.* 2022, **22**, 8867-8874.
- 138 14. Y. Ma, B. Wang, Y. Zhong, Z. Gao, H. Song, Y. Zeng, X. Wang, F. Huang, M.-R. Li,  
139 M. Wang, Bifunctional  $RbBiNb_2O_7$ /poly(tetrafluoroethylene) for high-efficiency

- 140 piezocatalytic hydrogen and hydrogen peroxide production from pure water, *Chem.*  
141 *Eng. J.* 2022, **446**, 136958.
- 142 15. R. Tang, D. Gong, Y. Zhou, Y. Deng, C. Feng, S. Xiong, Y. Huang, G. Peng, L. Li,  
143 Unique g-C<sub>3</sub>N<sub>4</sub>/PDI-g-C<sub>3</sub>N<sub>4</sub> homojunction with synergistic piezo-photocatalytic effect  
144 for aquatic contaminant control and H<sub>2</sub>O<sub>2</sub> generation under visible light, *Appl. Catal.*  
145 *B-Environ.* 2020, **303**, 120929.
- 146 16. J. X. Feng, Y. Fu, X. S. Liu, S. H. Tian, S. Y. Lan, Y. Xiong, Significant improvement  
147 and mechanism of ultrasonic inactivation to *Escherichia coil* with piezoelectric effect  
148 of hydrothermally synthesized *t*-BaTiO<sub>3</sub>. *ACS Sustain. Chem. Eng.* 2018, **6**, 6032-  
149 6041.
- 150 17. P. Wang, X. Li, S. Fan, X. Chen, M. Qin, D. Long, M. O. Tadé, S. Liu, Impact of  
151 oxygen vacancy occupancy on piezo-catalytic activity of BaTiO<sub>3</sub> nanobelt, *Appl.*  
152 *Catal. B-Environ.* 2020, **279**, 119340.
- 153 18. Shao, D. K., Zhang, L., Sun, S. M., Wang, W. Z. Oxygen reduction reaction for  
154 generating H<sub>2</sub>O<sub>2</sub> via piezo-catalytic process over bismuth oxychloride. *Chemsuschem*  
155 2018, **11**, 527-531.
- 156 19. G. Yin, C. Fu, F. Zhang, T. Wu, S. Hao, C. Wang, Q. Song, Piezocatalytic degradation  
157 of organic dyes and production of H<sub>2</sub>O<sub>2</sub> with hydroxyapatite, *J. Alloy. Compd.* 2023,  
158 **937**, 168382.
- 159 20. Y. Fu, C. a. Liu, M. Zhang, C. Zhu, H. Li, H. Wang, Y. Song, H. Huang, Y. Liu,  
160 Photocatalytic H<sub>2</sub>O<sub>2</sub> and H<sub>2</sub> Generation from Living *Chlorella vulgaris* and Carbon  
161 Micro Particle Comodified g-C<sub>3</sub>N<sub>4</sub>, *Adv. Energy. Mater.* 2018, **8**, 1802525.
- 162 21. H. Ou, P. Yang, L. Lin, M. Anpo, X. Wang, Carbon Nitride Aerogels for the  
163 Photoredox Conversion of Water, *Angew. Chem. Int. Edit.* 2017, **129**, 11045-11050.
- 164 22. S. Li, G. Dong, R. Hailili, L. Yang, Y. Li, F. Wang, Y. Zeng, Effective photocatalytic  
165 H<sub>2</sub>O<sub>2</sub> production under visible light irradiation at g-C<sub>3</sub>N<sub>4</sub> modulated by carbon  
166 vacancies, *Appl. Catal. B-Environ.* 2016, **190**, 26-35.
- 167 23. W. Zhang, X. Chen, X. Zhao, M. Yin, L. Feng, Simultaneous nitrogen doping and  
168 Cu<sub>2</sub>O oxidization by one-step plasma treatment toward nitrogen-doped Cu<sub>2</sub>O@CuO  
169 heterostructure: an efficient photocatalyst for H<sub>2</sub>O<sub>2</sub> evolution under visible light, *Appl.*  
170 *Surf. Sci.* 2020, **527**, 146908.
- 171 24. Y. Shiraishi, S. Kanazawa, Y. Kofuji, H. Sakamoto, S. Ichikawa, S. Tanaka, Sunlight-  
172 Driven Hydrogen Peroxide Production from Water and Molecular Oxygen by Metal-  
173 Free Photocatalysts, *Angew. Chem. Int. Edit.* 2014, **53**, 13454-13459.
- 174 25. Y.-X. Ye, J. Pan, F. Xie, L. Gong, S. Huang, Z. Ke, F. Zhu, J. Xu, Highly efficient  
175 photosynthesis of hydrogen peroxide in ambient conditions, *P. Natl. Acad. Sci. USA.*  
176 2021, **118**, e2103964118.
- 177 26. L. Chen, L. Wang, Y. Wan, Y. Zhang, Z. Qi, X. Wu, Acetylene and diacetylene  
178 functionalized covalent triazine frameworks as metal-free photocatalysts for hydrogen  
179 peroxide production: a new two-electron water oxidation pathway, *Adv. Mater.* 2020,  
180 **32**, 1904433.
- 181 27. L. Yang, G. Dong, D. L. Jacobs, Y. Wang, L. Zang, Two-channel photocatalytic  
182 production of H<sub>2</sub>O<sub>2</sub> over g-C<sub>3</sub>N<sub>4</sub> nanosheets modified with perylene imides, *J. Catal.*  
183 2017, **352**, 274-281.
- 184 28. J. Xiong, X. Li, J. Huang, X. Gao, Z. Chen, J. Liu, H. Li, B. Kang, W. Yao,  
185 CN/rGO@BPQDs high-low junctions with stretching spatial charge separation ability

- 186 for photocatalytic degradation and H<sub>2</sub>O<sub>2</sub> production, *Appl. Catal. B-Environ.* 2020,  
187 **266**, 118602.
- 188 29. S. Zhao, X. Zhao, Polyoxometalates-derived metal oxides incorporated into graphitic  
189 carbon nitride framework for photocatalytic hydrogen peroxide production under  
190 visible light, *J. Catal.* 2018, **366**, 98-106.
- 191 30. W.-K. Han, H.-S. Lu, J.-X. Fu, X. Liu, X. Zhu, X. Yan, J. Zhang, Y. Jiang, H. Dong,  
192 Targeted construction of a three-dimensional metal covalent organic framework with  
193 spn topology for photocatalytic hydrogen peroxide production, *Chem. Eng. J.* 2022,  
194 **449**, 137802.
- 195 31. X. Zhao, Y. You, S. Huang, Y. Wu, Y. Ma, G. Zhang, Z:cheme photocatalytic  
196 production of hydrogen peroxide over Bi<sub>4</sub>O<sub>5</sub>Br<sub>2</sub>/g-C<sub>3</sub>N<sub>4</sub> heterostructure under visible  
197 light, *Appl. Catal. B-Environ.* 2020, **278**, 119251.
- 198 32. H. Song, L. Wei, C. Chen, C. Wen, Photocatalytic production of H<sub>2</sub>O<sub>2</sub> and its in situ  
199 utilization over atomic-scale Au modified MoS<sub>2</sub> nanosheets, *J. Catal.* 2019, **376**, 198-  
200 208.
- 201 33. C. Chu, D. Huang, Q. Zhu, E. Stavitski, J. A. Spies, Z. Pan, J. Mao, H. L. Xin, C. A.  
202 Schmuttenmaer, Electronic tuning of metal nanoparticles for highly efficient  
203 photocatalytic hydrogen peroxide production, *ACS. Catal.* 2018, **9**, 626-631.
- 204 34. Q. Zhu, L. Shi, Z. Li, G. Li, Protonation of an Imine-linked Covalent Organic  
205 Framework for Efficient H<sub>2</sub>O<sub>2</sub> Photosynthesis under Visible Light up to 700 nm,  
206 *Angew. Chem. Int. Edit.* 2024, e202408041.
- 207 35. V. Maurino, C. Minero, E. Pelizzetti, G. Mariella, A. Arbezano and F. Rubertelli,  
208 Influence of Zn(II) adsorption on the photocatalytic activity and the production of  
209 H<sub>2</sub>O<sub>2</sub> over irradiated TiO<sub>2</sub>, *Res. Chem. Intermed.* 2007, **33**, 319-332.
- 210 36. L. Wang, S. Cao, K. Guo, Z. Wu, Z. Ma, Simultaneous hydrogen and peroxide  
211 production by photocatalytic water splitting, *Chin. J. Catal.* 2019, **40**, 470-475.
